# Supplementary material
Source: PubMed Central journal article supplement (PMC6499129)
Supplement: jamaoncol-5-887-s001.pdf [file jamaoncol-5-887-s001.pdf]

## Supplementary Online Content

Hilal T, Sonbol MB, Prasad V. Analysis of control arm quality in randomized clinical trials leading to anticancer drug approval by the US Food and Drug Administration. Published online May 2, 2019. *JAMA*. doi:10.1001/jamaoncol.2019.0167

**eTable 1.** List of RCTS with a control arm that is deemed optimal

**eTable 2.** Nature of sub-optimal control

This supplementary material has been provided by the authors to give readers additional information about their work.

**Abbreviations: SOC, standard of care; MFS, metastasis-free survival; PFS, progression-free survival; RFS, relapse-free survival; OS, overall survival; ORR, overall response rate; (i)DFS, (invasive) disease-free survival; EFS, event-free survival; CR, complete response; MMR, major molecular response**

**eTable 1. List of RCTs with a control arm that is deemed optimal**

| #  | Trial         | Indication                                                                         | Investigational Agent                   | Control                    | Primary Endpoint | Accrual Period                   | Scope/ Number of Sites | Date of Approval | Type of Approval | SOC Comments                                                      |
|----|---------------|------------------------------------------------------------------------------------|-----------------------------------------|----------------------------|------------------|----------------------------------|------------------------|------------------|------------------|-------------------------------------------------------------------|
| 1. | COLUMBUS      | Metastatic melanoma with BRAF V600E or V600K mutation                              | Encorafenib + binimetinib               | Encorafenib or Vemurafenib | PFS              | December 2013 to April 2015      | International/ 162     | June, 2018       | Regular          | Vemurafenib single-agent SOC                                      |
| 2. | GOG-0218      | Epithelial ovarian, fallopian tube or primary peritoneal cancer                    | Bevacizumab (+ carboplatin/ paclitaxel) | Carboplatin/ paclitaxel    | PFS              | October 2005 to June 2009        | International/ 336     | June, 2018       | Regular          | Carboplatin/ paclitaxel established SOC                           |
| 3. | COMBI-AD      | Adjuvant melanoma with BRAF V600E or V600K mutations after complete resection      | Dabrafenib and trametinib               | Placebo                    | RFS              | January 2013 to December 2014    | International/ 169     | May, 2018        | Regular          | No established SOC for adjuvant therapy in BRAF mutant melanoma   |
| 4. | FLAURA        | First-line metastatic NSCLC with EGFR exon 19 deletions or exon 21 L858R mutations | Osimertinib                             | Gefitinib or Erlotinib     | PFS              | December 2014 through March 2016 | International/ 132     | April, 2018      | Regular          | Gefitinib/erlotinib SOC in first-line setting                     |
| 5. | CheckMate-214 | First-line intermediate or poor-risk RCC                                           | Nivolumab/ipilimumab                    | Sunitinib                  | PFS, OS, ORR     | October 2014 through             | International/ 175     | April, 2018      | Regular          | Pazopanib shown to be "noninferior" to sunitinib in COMPARZ trial |

|     |            |                                                                                                        |                                  |            |         |                                              |                    |                |         |                                                                             |
|-----|------------|--------------------------------------------------------------------------------------------------------|----------------------------------|------------|---------|----------------------------------------------|--------------------|----------------|---------|-----------------------------------------------------------------------------|
|     |            |                                                                                                        |                                  |            |         | February 2016                                |                    |                |         |                                                                             |
| 6.  | ARIEL3     | Maintenance of recurrent ovarian, fallopian tube, or primary peritoneal cancer, at least 2 prior lines | Rucaparib                        | Placebo    | PFS     | April 7, 2014, and July 19, 2016             | International/87   | March, 2018    | Regular | Maintenance bevacizumab is not SOC. Major disagreement in NCCN (Category 3) |
| 7.  | ECHELO N-1 | Stage III or IV Hodgkin lymphoma                                                                       | BV (+ AVD)                       | ABVD       | mPFS    | November 19, 2012, through January 13, 2016  | International/218  | March, 2018    | Regular | PET-adapted therapy after ECHELON-1 started accruing                        |
| 8.  | MONARCH-3  | Postmenopausal HR-positive, HER-negative breast cancer                                                 | Abemaciclib (+ AI)               | AI         | PFS     | November 18, 2014 and November 11, 2015      | International/158  | February, 2018 | Regular | Started recruiting before approval of other CDK 4/6 inhibitors              |
| 9.  | PACIFIC    | Unresectable stage III NSCLC following chemoradiation                                                  | Durvalumab                       | Placebo    | PFS, OS | May 2014 and April 2016                      | International / NR | February, 2018 | Regular | No SOC in adjuvant setting of stage III NSCLC                               |
| 10. | LATITUDE   | Metastatic high-risk castration-sensitive prostate cancer                                              | Abiraterone (with prednisone)    | Placebo    | PFS, OS | February 12, 2013, through December 11, 2014 | International/235  | February, 2018 | Regular |                                                                             |
| 11. | NETTER-1   | Somatostatin receptor-positive GEP-NETs                                                                | Lutetium dotatate (+ octreotide) | Octreotide | PFS     | September 2012 through mid-January 2016      | International/41   | January, 2018  | Regular | Everolimus approval came after start of recruitment on NETTER-1             |

|     |               |                                                                                       |                                   |                                |      |                                       |                    |                 |         |                                                                   |
|-----|---------------|---------------------------------------------------------------------------------------|-----------------------------------|--------------------------------|------|---------------------------------------|--------------------|-----------------|---------|-------------------------------------------------------------------|
| 12. | APHINITY      | Adjuvant treatment of HER2-positive early breast cancer with chemo and trastuzumab    | Pertuzumab (+ chemo/ trastuzumab) | Placebo (+ chemo/ trastuzumab) | iDFS | November 2011 through August 2013     | International/ 549 | December, 2017  | Regular |                                                                   |
| 13. | CheckMate-238 | Adjuvant melanoma with lymph nodes                                                    | Nivolumab                         | Ipilimumab                     | RFS  | March 30, 2015, to November 30, 2015  | International/ 130 | December, 2017  | Regular | Ipilimumab is SOC                                                 |
| 14. | CABOSUN       | First line RCC, intermediate and poor risk                                            | Cabozantinib                      | Sunitinib                      | PFS  | From July 9, 2013, to April 6, 2015   | National/ NA       | December, 2017  | Regular | Sunitinib shown to be "noninferior" to pazopanib in COMPARZ trial |
| 15. | S-TRAC        | Adjuvant RCC                                                                          | Sunitinib                         | Placebo                        | DFS  | September 19, 2007, to April 7, 2011  | International/ 99  | November, 2017  | Regular | No SOC for RCC in the adjuvant setting                            |
| 16. | GALLIUM       | Previously untreated stage II bulky, III, or IV follicular lymphoma                   | Obinutuzumab (with chemo)         | Rituximab (with chemo)         | PFS  | July 6, 2011, and February 4, 2014    | International/ NA  | November, 2017  | Regular | Rituximab + chemo is SOC                                          |
| 17. | ALEX          | ALK-positive metastatic NSCLC                                                         | Alectinib                         | Crizotinib                     | PFS  | August 18, 2014, and January 20, 2016 | International/ 98  | November, 2017  | Regular |                                                                   |
| 18. | MONARCH-2     | HR-positive, HER2-negative metastatic breast cancer with disease prog on endocrine tx | Abemaciclib (with fulvestrant)    | Placebo (with fulvestrant)     | PFS  | August 2014 and December 2015         | International/ 142 | September, 2017 | Regular | Fulvestrant is SOC                                                |
| 19. | ALFA-0701     | Previously untreated AML                                                              | Gemtuzumab (with 7 + 3)           | Placebo (with 7+3)             | EFS  | January, 2008, and                    | National/ 26       | September, 2017 | Regular |                                                                   |

|     |               |                                                                                    |                             |                                                                           |        |                                            |                      |              |             |                                                                 |
|-----|---------------|------------------------------------------------------------------------------------|-----------------------------|---------------------------------------------------------------------------|--------|--------------------------------------------|----------------------|--------------|-------------|-----------------------------------------------------------------|
|     |               |                                                                                    |                             |                                                                           |        | November, 2010                             |                      |              |             |                                                                 |
| 20. | SOLO2         | Maintenance for BRCA-mutated ovarian cancer in CR or PR after platinum-based chemo | Olaparib                    | Placebo                                                                   | PFS    | Sept 3, 2013, and Nov 21, 2014             | International/123    | August, 2017 | Regular     | No approved standard. Maintenance bevacizumab is controversial. |
| 21. | INO-VATE ALL  | Relapsed/ref B-ALL                                                                 | Inotuzumab                  | Standard chemotherapy                                                     | CR, OS | August 27, 2012, and October 2, 2014       | International/NA     | August, 2017 | Regular     | Physician choice of second-line induction                       |
| 22. | CLTR03 10-301 | t-AML or AML-MRC                                                                   | CPX-351                     | 7 + 3 (cytarabine + daunorubicin 60 mg)                                   | OS     | December 2012 and November 2014            | U.S. and Canada / 39 | August, 2017 | Regular     |                                                                 |
| 23. | ExteNET       | Adjuvant HER-2-positive breast cancer                                              | Neratinib                   | Placebo                                                                   | iDFS   | Between July 9, 2009, and Oct 24, 2011     | International/NA     | July, 2017   | Regular     |                                                                 |
| 24. | TOWER         | Relapsed/ref B-ALL                                                                 | Blinatumomab                | FLAG + anthracycline, HiDAC-based, high-dose MTR-based, clofarabine-based | OS     | Between January 2014, and September 2015   | International/101    | July, 2017   | Regular     |                                                                 |
| 25. | Keynote-021   | Previously untreated metastatic NSCLC                                              | Pembrolizumab (+ carbo/pem) | Platinum-based doublet                                                    | ORR    | Between November 25, 2014 and Jan 25, 2016 | International/26     | May, 2017    | Accelerated |                                                                 |

|     |              |                                                                                 |                         |                       |     |                                                 |                    |                |         |                                                                                                                           |
|-----|--------------|---------------------------------------------------------------------------------|-------------------------|-----------------------|-----|-------------------------------------------------|--------------------|----------------|---------|---------------------------------------------------------------------------------------------------------------------------|
| 26. | RATIFY       | FLT3+ AML                                                                       | Midostaurin (with 7+ 3) | 7 + 3                 | OS  | Between May 2008 to March 7, 2016               | International/ 225 | April, 2017    | Regular |                                                                                                                           |
| 27. | RESORCE      | HCC in pts previously treated with sorafenib                                    | Regorafenib             | Placebo               | OS  | Between May 14, 2013 and Dec 31, 2015           | International/ 152 | April, 2017    | Regular |                                                                                                                           |
| 28. | PALOMA-2     | Postmenopausal HR-positive, HER-negative breast cancer                          | Palbociclib (+AI)       | Placebo +letrozole    | PFS | Between February 2013 through July 2014         | International/ 186 | March, 2017    | Regular |                                                                                                                           |
| 29. | AURA-3       | Metastatic EGFR T790M-mutated NSCLC after progression                           | Osimertinib             | Platinum + pemetrexed | PFS | Between August 2014 through September 2015      | International/ 126 | March, 2017    | Regular |                                                                                                                           |
| 30. | NOVA         | Maintenance for recurrent ovarian cancer in CR or PR after platinum-based chemo | Niraparib               | Placebo               | PFS | Between August 26, 2013 through June 20, 2016   | International/ 107 | March, 2017    | Regular | Other PARP inhibitors approved in first remission or third remission                                                      |
| 31. | MONALEESA-2  | Postmenopausal HR-positive, HER-negative breast cancer                          | Ribociclib (+AI)        | AI                    | PFS | Between January 24, 2014 through March 24, 2015 | International/ NA  | March, 2017    | Regular |                                                                                                                           |
| 32. | CALGB 100104 | Maintenance for myeloma following ASCT                                          | Lenalidomide            | Placebo               | PFS | Between April 14, 2005 through July 2, 2009     | National/ 47       | February, 2017 | Regular | Thalidomide maintenance data available with data showing improved outcomes, but not chosen as control because of toxicity |

|     |                |                                                                                                          |                                                    |                                                                                                                                                                                       |     |                                                      |                       |                   |         |                                                                                                                                             |
|-----|----------------|----------------------------------------------------------------------------------------------------------|----------------------------------------------------|---------------------------------------------------------------------------------------------------------------------------------------------------------------------------------------|-----|------------------------------------------------------|-----------------------|-------------------|---------|---------------------------------------------------------------------------------------------------------------------------------------------|
| 33. | IFM<br>2005-02 | Maintenance<br>for myeloma<br>following ASCT                                                             | Lenalidomide                                       | Placebo                                                                                                                                                                               | PFS | Between<br>July 2006<br>through<br>August<br>2008    | Europe<br>/ 77        | February,<br>2017 | Regular | Thalidomide<br>maintenance data<br>available with data<br>showing improved<br>outcomes, but not<br>chosen as control<br>because of toxicity |
| 34. | CASTOR         | Myeloma after<br>at least one<br>prior therapy                                                           | Daratumumab<br>(+<br>bortezomib/dex<br>amethasone) | Bortezomib/<br>dexamethasone                                                                                                                                                          | PFS | September 4, 2014,<br>to<br>September 24,<br>2015,   | International/<br>115 | November,<br>2016 | Regular |                                                                                                                                             |
| 35. | POLLUX         | Myeloma after<br>at least one<br>prior therapy                                                           | Daratumumab<br>(+ len/dex)                         | Lenalidomide<br>/dexamethasone                                                                                                                                                        | PFS | June 16,<br>2014, and<br>July 14,<br>2015            | International/<br>135 | November,<br>2016 | Regular |                                                                                                                                             |
| 36. | CheckMate-141  | Recurrent or<br>metastatic SCC<br>of HN progress<br>on or after<br>platinum<br>(refractory <6<br>months) | Nivolumab                                          | Single-agent<br>(MTX,<br>docetaxel,<br>cetuximab)                                                                                                                                     | OS  | Between<br>June<br>2014<br>through<br>August<br>2015 | International/<br>NA  | November,<br>2016 | Regular |                                                                                                                                             |
| 37. | KEYNOTE-024    | Metastatic<br>NSCLC who<br>express PD-L1                                                                 | Pembrolizumab                                      | Investigator's<br>choice<br>(carboplatin/<br>pemetrexed,<br>cisplatin/<br>pemetrexed,<br>carboplatin/<br>gemcitabine,<br>cisplatin/<br>gemcitabine, or<br>carboplatin/<br>paclitaxel) | PFS | June<br>2014<br>through<br>August<br>2015            | International/<br>142 | October,<br>2016  | Regular |                                                                                                                                             |
| 38. | OAK            | Metastatic<br>NSCLC who<br>progress                                                                      | Atezolizumab                                       | Docetaxel                                                                                                                                                                             | OS  | March 11,<br>2014, and                               | International/<br>194 | October,<br>2016  | Regular |                                                                                                                                             |

|     |                 |                                                                                       |                             |                       |                      |                                       |                    |                |         |                                              |
|-----|-----------------|---------------------------------------------------------------------------------------|-----------------------------|-----------------------|----------------------|---------------------------------------|--------------------|----------------|---------|----------------------------------------------|
|     |                 | during or following platinum chemotherapy                                             |                             |                       |                      | Nov 28, 2014                          |                    |                |         |                                              |
| 39. | Motzer, 2015    | Advanced RCC following one line of therapy                                            | Lenvatinib + Everolimus     | Everolimus            | PFS                  | March 16, 2012, to June 19, 2013      | International/ 37  | May, 2016      | Regular | Nivolumab not approved yet                   |
| 40. | PALOMA-3        | HR-positive, HER2-negative metastatic breast cancer with disease prog on endocrine tx | Palbociclib (+ fulvestrant) | Fulvestrant + placebo | PFS                  | Oct 7, 2013, and Aug 26, 2014         | International/ 144 | February, 2016 | Regular |                                              |
| 41. | Schöffski, 2016 | Metastatic liposarcoma who received anthracycline                                     | Eribulin                    | Dacarbazine           | OS                   | March 10, 2011 and May 22, 2013       | International/ 110 | January, 2016  | Regular |                                              |
| 42. | PROLONG         | Extended therapy (maintenance) in Recurrent/progressive CLL in PR or CR               | Ofatumumab                  | Observation           | PFS                  | May 6, 2010, and June 19, 201         | International/ 130 | January, 2016  | Regular | Rituximab maintenance. No data prior to 2010 |
| 43. | KEYNOTE-006     | Unresectable or metastatic melanoma                                                   | Pembrolizumab               | Ipilimumab            | PFS and OS           | September 18, 2013, to March 3, 2014, | International/ NR  | December, 2015 | Regular |                                              |
| 44. | ELOQUENT-2      | Myeloma after at least one prior therapy                                              | Elotuzumab (+ len/ dex)     | Len/ dexamethasone    | Copriary, PFS and OS | June 2011 and November 2012           | International/ 168 | November, 2015 | Regular | Triplet therapy is standard as of 2011.      |
| 45. | SQUIRE          | Metastatic squamous lung cancer                                                       | Necitumumab (+ gem + cis)   | GEM+CIS               | OS                   | Jan 7, 2010, and Feb 22, 2012         | International/ 184 | November, 2015 | Regular |                                              |



|     |                   |                                                                                           |                                  |                       |     |                                          |                   |                |         |                                                                                                                       |
|-----|-------------------|-------------------------------------------------------------------------------------------|----------------------------------|-----------------------|-----|------------------------------------------|-------------------|----------------|---------|-----------------------------------------------------------------------------------------------------------------------|
| 46. | CHECKMATE-025     | Advanced RCC following one line of therapy                                                | Nivolumab                        | Everolimus            | OS  | October 2012 through March 2014          | International/146 | November, 2015 | Regular |                                                                                                                       |
| 47. | Long, 2015        | Unresectable or metastatic melanoma with BRAF V600E mutations                             | Dabrafenib and trametinib        | Dabrafenib + placebo  | PFS | May 4, 2012, and Nov 30, 2012,           | International/113 | November, 2015 | Regular |                                                                                                                       |
| 48. | Larkin, 2014      | Unresectable or metastatic melanoma with BRAF V600E mutations                             | Cobimetinib (with vemurafenib)   | Vemurafenib + placebo | PFS | January 2013 through January 2014        | International/135 | November, 2015 | Regular |                                                                                                                       |
| 49. | Eggermont, 2016   | Adjuvant melanoma with lymph nodes                                                        | Ipilimumab                       | Placebo               | RFS | From July 2008 through August 2011       | International/99  | October, 2015  | Regular | IFN was category 2B as improved RFS but not OS: observation or clinical trials were the other recommendations by NCCN |
| 50. | Demetri, 2016     | Unresectable or metastatic liposarcoma or leiomyosarcoma who received prior anthracycline | Trabectedin                      | Decarbazine           | OS  | May 27, 2011, and the September 16, 2013 | International/85  | October, 2015  | Regular |                                                                                                                       |
| 51. | Wang-Gillam, 2015 | Metastatic adenocarcinoma of pancreas after gemcitabine-based therapy                     | Liposomal irinotecan (with 5-FU) | 5-FU                  | OS  | Jan 11, 2012, and Sept 11, 2013,         | International/76  | October, 2015  | Regular |                                                                                                                       |
| 52. | Borghaei, 2015    | Metastatic NSCLC after progression of                                                     | Nivolumab                        | Docetaxel             | OS  | November 2012 through                    | International/NR  | October, 2015  | Regular |                                                                                                                       |

|     |                    |                                                                         |                                            |                                       |     |                                         |                    |                 |             |                                         |
|-----|--------------------|-------------------------------------------------------------------------|--------------------------------------------|---------------------------------------|-----|-----------------------------------------|--------------------|-----------------|-------------|-----------------------------------------|
|     |                    | platinum therapy                                                        |                                            |                                       |     | December 2013                           |                    |                 |             |                                         |
| 53. | Postow, 2015       | Unresectable or metastatic melanoma with BRAF V600E wild-type           | Nivolumab (+ipilimumab)                    | Ipilimumab + Placebo                  | ORR | September 16, 2013, to February 6, 2014 | International/ NR  | September, 2015 | Accelerated |                                         |
| 54. | Mayer, 2015        | Metastatic colorectal cancer, third-line                                | TAS-102                                    | Placebo                               | OS  | June 17, 2012, and October 8, 2013      | International/ NR  | September, 2015 | Regular     |                                         |
| 55. | Moskowitz, 2015    | cHL after ASCT consolidation treatment                                  | BV                                         | Placebo                               | PFS | April 6, 2010, and Sept 21, 2012        | International/ 78  | August, 2015    | Regular     |                                         |
| 56. | ASPIRE             | Myeloma after at least one prior therapy                                | Carfilzomib (+ len/ dex)                   | Len/ dex                              | PFS | July 2010 and March 2012                | International/ NR  | July, 2015      | Regular     | Triplet regimen is standard as of 2011. |
| 57. | Tabernero, 2015    | Metastatic colorectal cancer who progress on bev- oxali- 5-FU regimen   | Ramucirumab (+FOLFIRI)                     | FOLFIRI + Placebo                     | OS  | Dec 14, 2010, and Aug 23, 2013          | International/ 224 | April, 2015     | Regular     |                                         |
| 58. | Brahmer, 2015      | Metastatic squamous lung cancer with progression after platinum therapy | Nivolumab                                  | Docetaxel                             | OS  | October 2012 through December 2013      | International/ NR  | March, 2015     | Regular     |                                         |
| 59. | PANORAMA1          | Myeloma after at least 2 lines of therapy                               | Panobinostat (+ bortezomib/ dexamethasone) | Placebo (+ bortezomib/ dexamethasone) | PFS | January, 2010 through February, 2012    | International/ 215 | February, 2015  | Regular     |                                         |
| 60. | Schlumberger, 2015 | Metastatic differentiated thyroid cancer                                | Lenvatinib                                 | Placebo                               | PFS | August 5, 2011, through                 | International/ NR  | February, 2015  | Regular     |                                         |

|     |                |                                                                           |                                     |                                                                                                                                        |                                            |                                         |                  |                |             |  |
|-----|----------------|---------------------------------------------------------------------------|-------------------------------------|----------------------------------------------------------------------------------------------------------------------------------------|--------------------------------------------|-----------------------------------------|------------------|----------------|-------------|--|
|     |                |                                                                           |                                     |                                                                                                                                        |                                            | October 4, 2012                         |                  |                |             |  |
| 61. | PALOMA-1       | Postmenopausal HR-positive, HER-negative breast cancer                    | Palbociclib (+ AI)                  | Letrozole                                                                                                                              | PFS                                        | Dec 22, 2009, and May 12, 2012,         | International/50 | February, 2015 | Accelerated |  |
| 62. | Weber, 2015    | Unresectable or metastatic melanoma and disease progression following ipi | Nivolumab                           | Chemotherapy (decarbazine OR carboplatin/paclitaxel)                                                                                   | ORR, OS                                    | Dec 21, 2012, to Jan 10, 2014           | International/90 | December, 2014 | Accelerated |  |
| 63. | CLARINET       | Unresectable or metastatic GEP-NETs                                       | Lanreotide                          | Placebo                                                                                                                                | PFS                                        | June 2006 and April 2013                | International/48 | December, 2014 | Regular     |  |
| 64. | REVEL          | Metastatic NSCLC after progression of platinum therapy                    | Ramucirumab (+ docetaxel)           | Docetaxel+ Placebo                                                                                                                     | OS                                         | Dec 3, 2010, and Jan 24, 2013           | International/NR | December, 2014 | Regular     |  |
| 65. | Vannucci, 2015 | PV who had inadequate response to hydroxyurea                             | Ruxolitinib                         | Hydroxyurea, interferon or pegylated interferon, pipobroman, anagrelide, immunomodulators (lenalidomide or thalidomide), no medication | Hematologic control, spleen size reduction | November 29, 2010, to February 13, 2013 | International/NR | December, 2014 | Regular     |  |
| 66. | AURELIA        | Platinum-resistant, recurrent ovarian cancer                              | Bevacizumab (+ paclitaxel or Doxil) | Chemotherapy (pegylated liposomal doxorubicin, weekly                                                                                  | PFS                                        | October 2009 and April 2011             | International/NR | November, 2014 | Regular     |  |

|     |                |                                                                 |                                                              |                                                             |     |                                     |                   |                 |             |                                                                                            |
|-----|----------------|-----------------------------------------------------------------|--------------------------------------------------------------|-------------------------------------------------------------|-----|-------------------------------------|-------------------|-----------------|-------------|--------------------------------------------------------------------------------------------|
|     |                |                                                                 |                                                              | paclitaxel, or topotecan)                                   |     |                                     |                   |                 |             |                                                                                            |
| 67. | RAINBOW        | Advanced gastric or GEJ adenocarcinoma                          | Ramucirumab (+ paclitaxel)                                   | Paclitaxel                                                  | OS  | Dec 23, 2010, and Sept 23, 2011     | International/170 | November, 2014  | Regular     |                                                                                            |
| 68. | Tewari, 2014   | Recurrent cervical cancer                                       | Bevacizumab (+ paclitaxel/cisplatin or paclitaxel/topotecan) | Chemotherapy (paclitaxel/cisplatin or paclitaxel/topotecan) | OS  | April 2009 and January 2012         | National/11       | August, 2014    | Regular     |                                                                                            |
| 69. | Furman, 2014   | Relapsed CLL                                                    | Idelalisib (+ rituximab)                                     | Placebo + rituximab                                         | PFS | May 2012 and August 2013            | International/90  | July, 2014      | Regular     |                                                                                            |
| 70. | COMPLEMENT1    | Previously untreated CLL who are not candidates for fludarabine | Ofatumumab (+ chlorambucil)                                  | Chlorambucil                                                | PFS | Dec 22, 2008, and May 26, 2011      | International/109 | April, 2014     | Regular     | Chlorambucil is used as single-agent but most would use BR if fludarabine cannot be given. |
| 71. | Flaherty, 2012 | Unresectable or metastatic melanoma with BRAF V600E mutations   | Dabrafenib and trametinib                                    | Dabrafenib monotherapy                                      | ORR | March 26, 2010, to July 7, 2011     | International/16  | January, 2014   | Accelerated |                                                                                            |
| 72. | DECISION       | Metastatic differentiated thyroid cancer                        | Sorafenib                                                    | Placebo                                                     | PFS | October 2009 to August 2011         | International/77  | November, 2013  | Regular     |                                                                                            |
| 73. | Shaw, 2013     | ALK-positive metastatic NSCLC                                   | Crizotinib                                                   | Chemotherapy (pemetrexed OR docetaxel)                      | PFS | February 2010 through February 2012 | International     | November, 2013  | Regular     |                                                                                            |
| 74. | NeoSphere      | Neoadjuvant HER2-positive locally advanced breast cancer        | Pertuzumab combination                                       | Trastuzumab / docetaxel OR Pertuzumab/trastuzumab           | pCR | Dec 17, 2007, to Dec 22, 2009       | International/59  | September, 2013 | Accelerated |                                                                                            |

|     |                 |                                                               |                                |                                                                                                                       |     |                                 |                   |                 |         |                                                     |
|-----|-----------------|---------------------------------------------------------------|--------------------------------|-----------------------------------------------------------------------------------------------------------------------|-----|---------------------------------|-------------------|-----------------|---------|-----------------------------------------------------|
|     |                 |                                                               |                                | /docetaxel (group B) OR pertuzumab/trastuzumab (group C) OR pertuzumab/docetaxel (group D)                            |     |                                 |                   |                 |         |                                                     |
| 75. | IMPACT          | First-line pancreatic cancer                                  | Nab-paclitaxel (+ gemcitabine) | Gemcitabine                                                                                                           | OS  | May 2009 through April 2012     | International/151 | September, 2013 | Regular |                                                     |
| 76. | Flaherty, 2012  | Unresectable or metastatic melanoma with BRAF V600E mutations | Trametinib                     | Chemotherapy (decarbazine OR paclitaxel)                                                                              | PFS | December 2010 through July 2011 | International/103 | June, 2013      | Regular |                                                     |
| 77. | Hauschild, 2012 | Unresectable or metastatic melanoma with BRAF V600E mutations | Dabrafenib                     | decarbazine                                                                                                           | PFS | Dec 23, 2010, and Sept 1, 2011  | International/70  | June, 2013      | Regular |                                                     |
| 78. | ALSYMP CA       | Castration resistant prostate cancer, symptomatic brain mets  | Radium 223                     | Placebo + SOC (included local radiotherapy, corticosteroids, anti-androgens, estrogens, estramustine or ketoconazole) | OS  | June 2008 through February 2011 | International/136 | May, 2013       | Regular | Patients were not eligible to or declined docetaxel |
| 79. | EURTAC          | First-line metastatic NSCLC with EGFR exon 19 deletions or    | Erlotinib                      | Platinum-based chemotherapy                                                                                           | PFS | Feb 15, 2007, and Jan 4, 2011   | Europe / NR       | May, 2013       | Regular | Trial conducted in Europe only.                     |

|     |         |                                                                                        |                                   |                          |                     |                                    |                    |                |         |  |
|-----|---------|----------------------------------------------------------------------------------------|-----------------------------------|--------------------------|---------------------|------------------------------------|--------------------|----------------|---------|--|
|     |         | exon 21 L858R mutations                                                                |                                   |                          |                     |                                    |                    |                |         |  |
| 80. | EMILIA  | HER-2 positive metastatic breast cancer who previously received trastuzumab and taxane | TDM-1                             | Capecitabine + lapatinib | PFS, OS, and safety | February 2009 through October 2011 | International/ 213 | February, 2013 | Regular |  |
| 81. | ML18147 | Metastatic colorectal cancer after progression on first-line bev regimen               | Bevacizumab (+ FOLFIRI or FOLFOX) | FOLFIRI/FOLFOX           | OS                  | Feb 1, 2006, until June 9, 2010    | International/ 220 | January, 2013  | Regular |  |

**eTable 2. Nature of sub-optimal control**

| <b>Category of Sub-Optimal Control</b>                                                                                                | <b>Trials</b>                                                                                         |
|---------------------------------------------------------------------------------------------------------------------------------------|-------------------------------------------------------------------------------------------------------|
| Omitting active treatment in control arm by limiting investigator's choice                                                            | OlympiAD, ALCANZA, Keynote-045, GADOLIN                                                               |
| Omitting active treatment in control arm by using control known to be inferior to other available agents or not allowing combinations | PROSPER, SPARTAN, BFORE, ASCEND-4, Tap et al, METEOR, RADIANT-4, TOURMALIN, REGARD, CLL11, LUX-Lung 3 |
| Using previously used treatment in control arm with known lack of benefit upon re-exposure                                            | MURANO                                                                                                |
